# Supplementary material for: The Effect of SERCA Activation on Functional Characteristics and Signaling of Rat Soleus Muscle upon 7 Days of Unloading
Source: MDPI journal article supplement (doi:10.3390/biom13091354), 2023-09-06

Oxidized and reduced tropomyosin

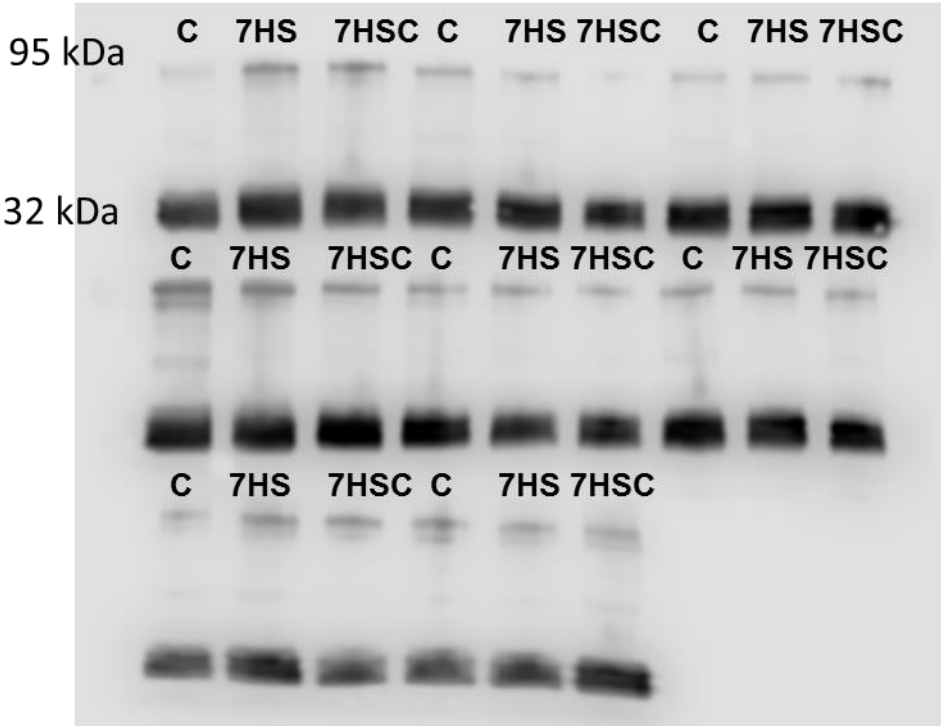

p-CaMK II (beta)

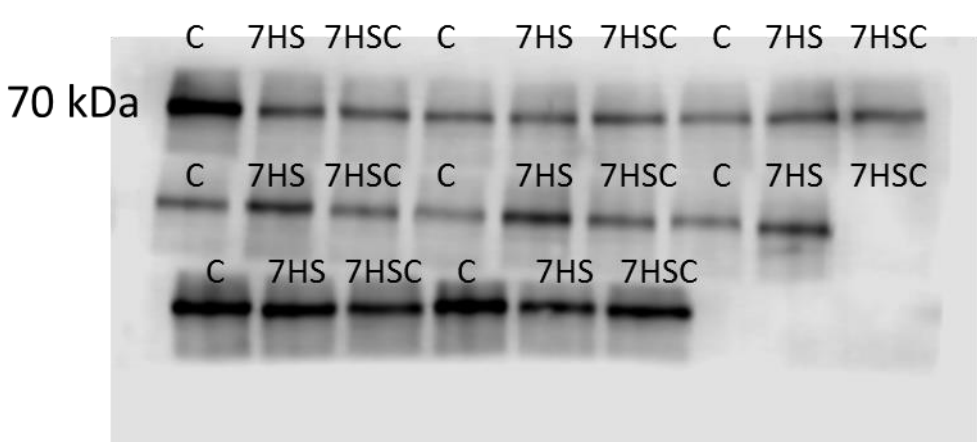

total-CaMK II (beta)

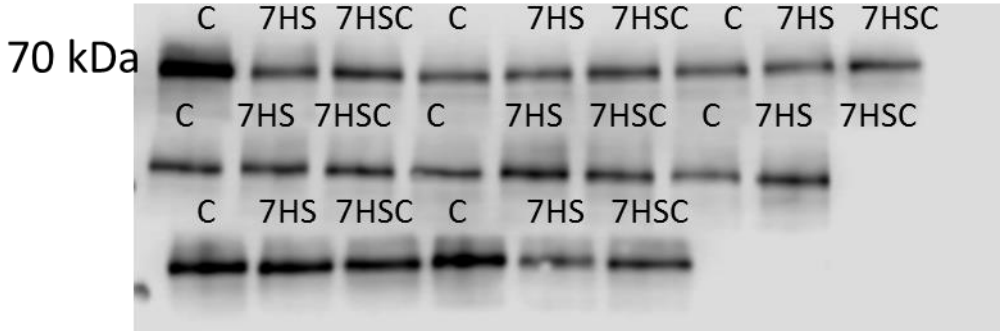

p-JNK1/2

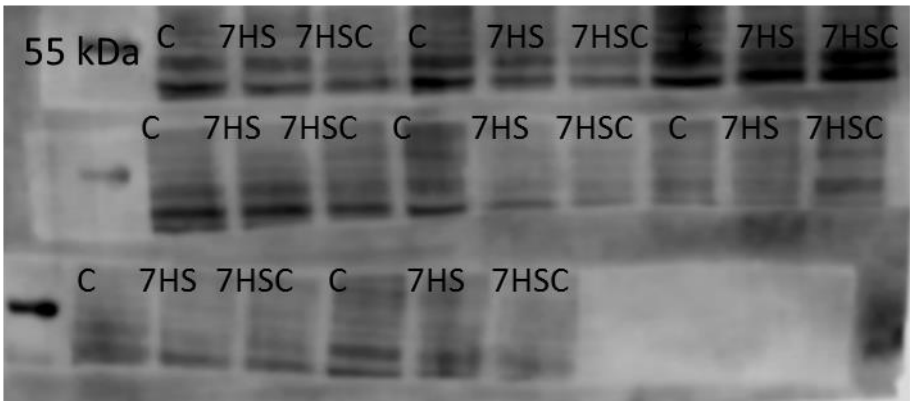

total-JNK1/2

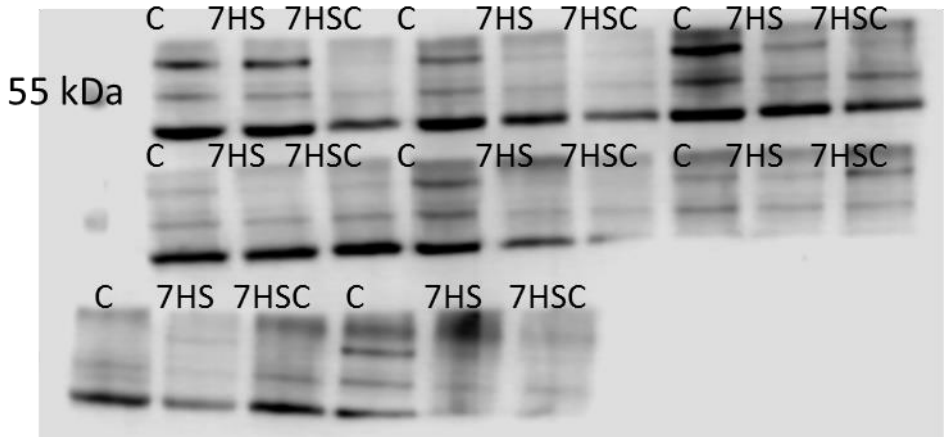

p-p38

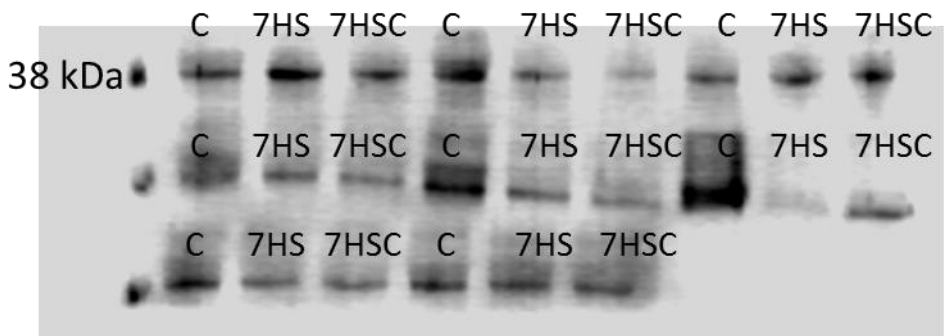

total-p38

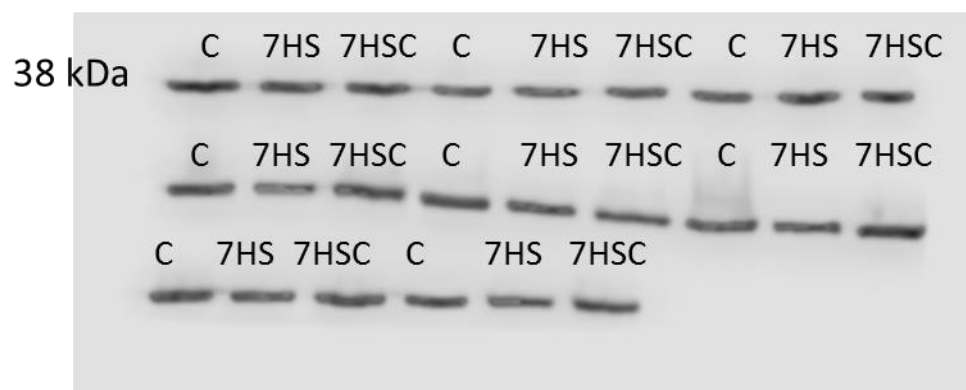

TOM20

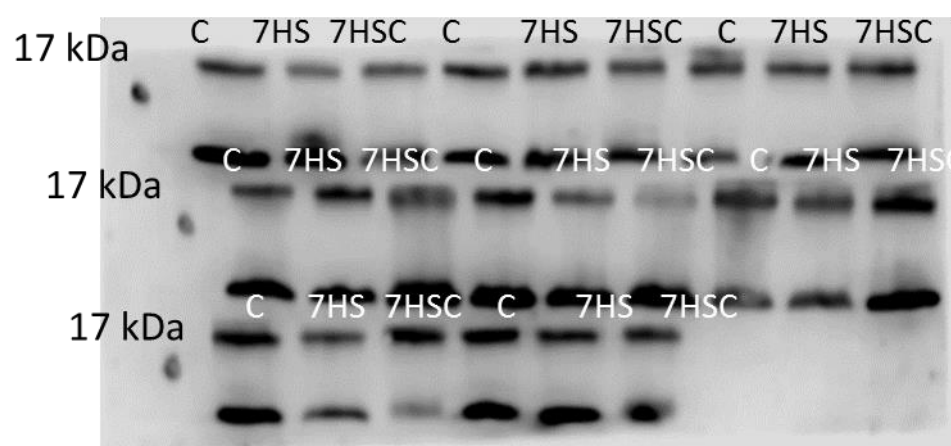

GAPDH

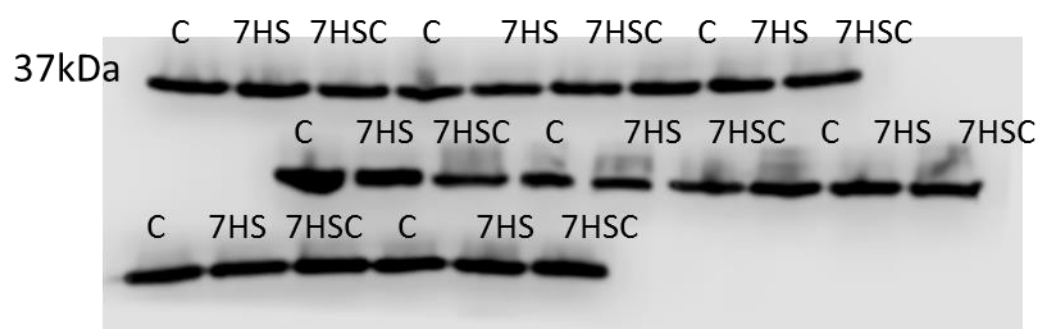

p-p70

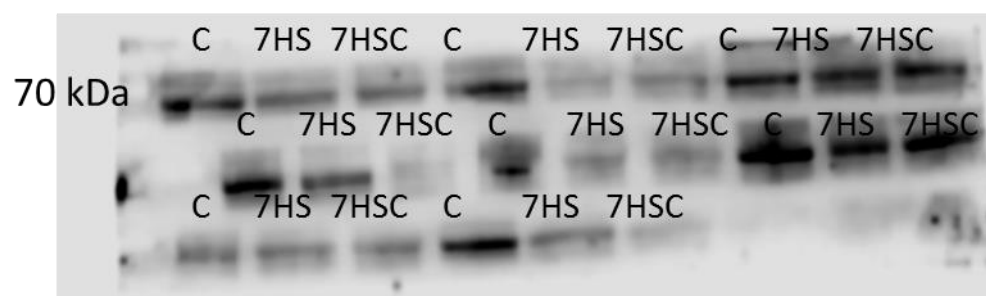

total-p70

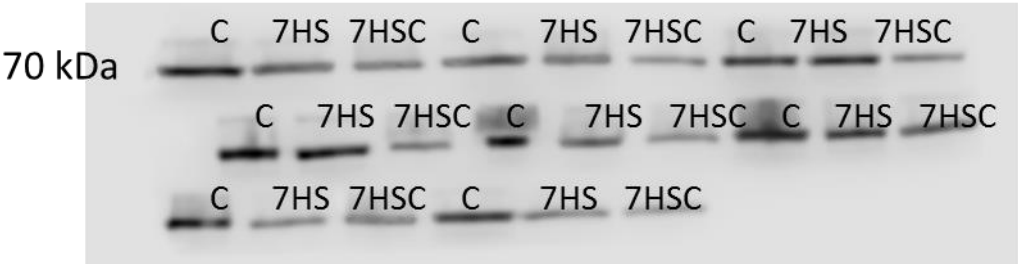

p-eEF2

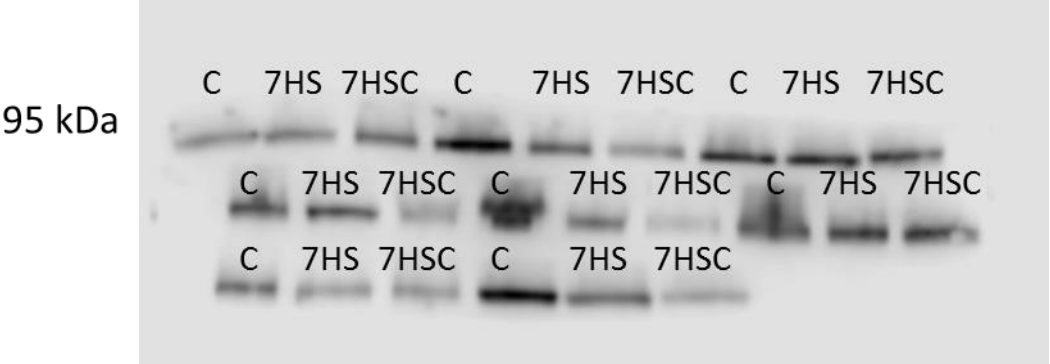

total-eEF2

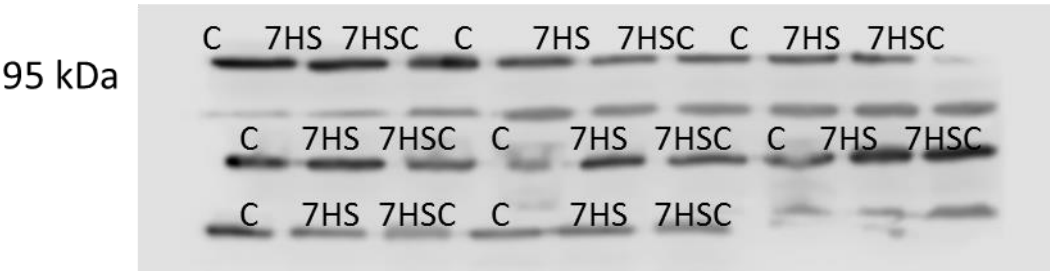

Supplement: s1 [file s1]
